# Supplementary material
Source: MDPI journal article supplement (https://www.mdpi.com/2073-4395/12/12/2916)
Supplement: s1 [file s1]

## Supplementary

**Table S1.** Potato cultivars and breeding lines used to assess tolerance to PSTVd

| №  | Cultivar       | Year of inclusion in the Russian State Register | Origin             | Reproduction      |
|----|----------------|-------------------------------------------------|--------------------|-------------------|
| 1  | Avrora         | 2006                                            | Russia             | Mini-tubers       |
| 2  | Arizona        | 2013                                            | Netherlands        | Super elite       |
| 3  | Ariel          | 2021                                            | Russia             | Super-super elite |
| 4  | Armada         | Not registred                                   | Russia             | Breeding line     |
| 5  | Bellarosa      | 2006                                            | Germany            | Super elite       |
| 6  | Berkut         | Not registred                                   | Kazakhstan         | Breeding line     |
| 7  | Bernina        | 2017                                            | Germany            | Super elite       |
| 8  | Bizon          | Not registred                                   | Russia             | Breeding line     |
| 9  | Briz           | 2009                                            | Belarus            | Elite             |
| 10 | Charoit        | 2014                                            | Russia             | Super-super elite |
| 11 | Colomba        | 2013                                            | Netherlands        | Super elite       |
| 12 | Donata         | 2019                                            | Germany            | Super elite       |
| 13 | Elizaveta      | 1996                                            | Russia             | Mini-tubers       |
| 14 | Favorit        | 2014                                            | Russia             | Super-super elite |
| 15 | Flagman        | Not registred                                   | Russia             | Breeding line     |
| 16 | Gala           | 2008                                            | Russia/Germany     | Mini-tubers       |
| 17 | Impala         | 1995                                            | Netherlands/Russia | Super elite       |
| 18 | Krepysh        | 2005                                            | Russia             | Super-super elite |
| 19 | Labadia        | 2010                                            | Netherlands/Russia | Elite             |
| 20 | Madeira        | 2017                                            | Germany            | Super elite       |
| 21 | Manifest       | 2014                                            | Belarus            | Elite             |
| 22 | Meteor         | 2013                                            | Russia             | Super elite       |
| 23 | Mirazh         | Not registred                                   | Russia             | Breeding line     |
| 24 | Nandina        | 2015                                            | Germany            | Super elite       |
| 25 | Navigator      | Not registred                                   | Russia             | Breeding line     |
| 26 | Nevskiy        | 1982                                            | Russia             | Elite             |
| 27 | Phioletovyi    | 2014                                            | Russia             | Super elite       |
| 28 | Queen Anna     | 2015                                            | Germany            | Super elite       |
| 29 | Riviera        | 2013                                            | Netherlands/Russia | Mini-tubers       |
| 30 | Sanibel        | 2019                                            | Germany            | Super elite       |
| 31 | Sapsan         | Not registred                                   | Russia             | Breeding line     |
| 32 | Sineglazka2016 | 2019                                            | Russia             | Elite             |
| 33 | Siurpriz       | 2021                                            | Russia             | Super-super elite |
| 34 | Sorentina      | 2020                                            | Germany            | Super elite       |
| 35 | Sprinter       | Not registred                                   | Russia             | Breeding line     |
| 36 | Udacha         | 1994                                            | Russia             | Mini-tubers       |
| 37 | Vineta         | 2001                                            | Russia/Germany     | Super elite       |
| 38 | 1923-3         | Breeding line                                   | Russia             | Breeding line     |
| 39 | 4434-1         | Breeding line                                   | Russia             | Breeding line     |

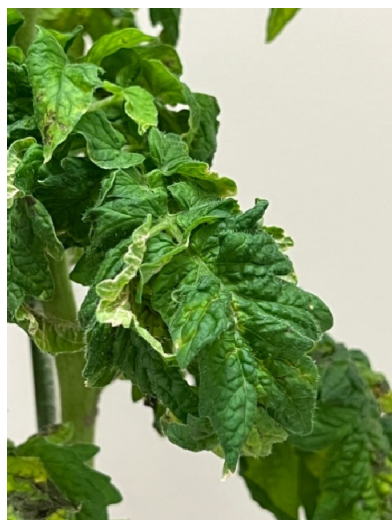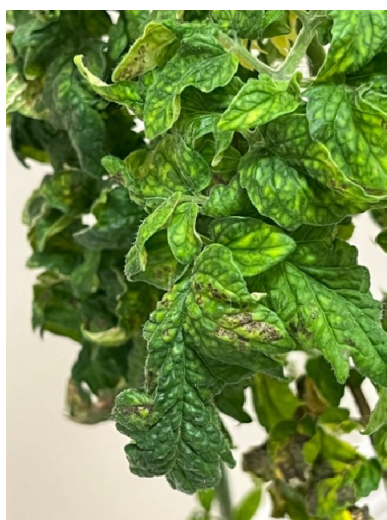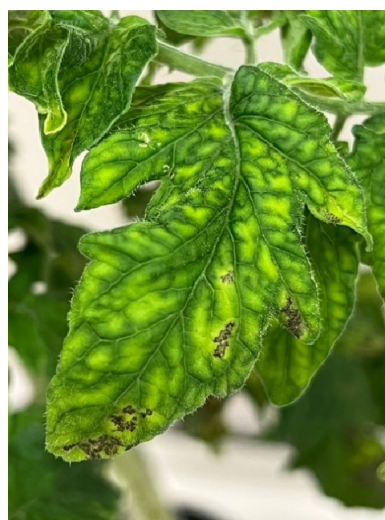

VP87

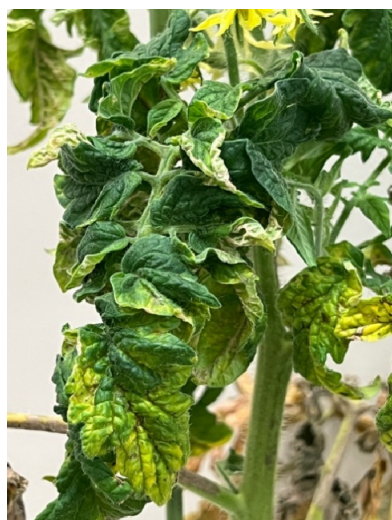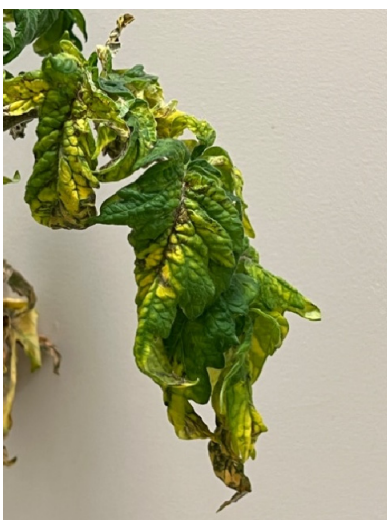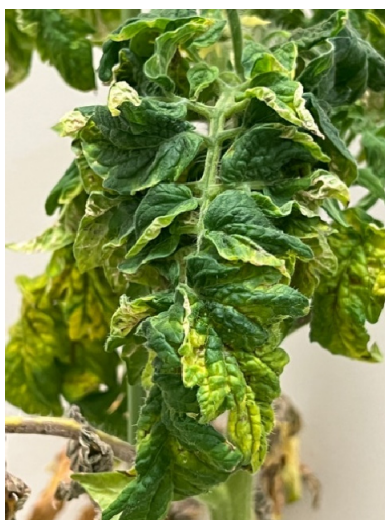

FP10-13

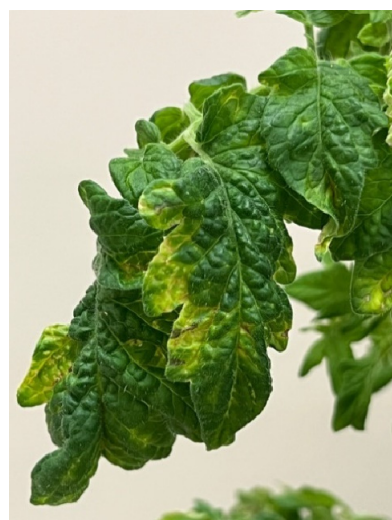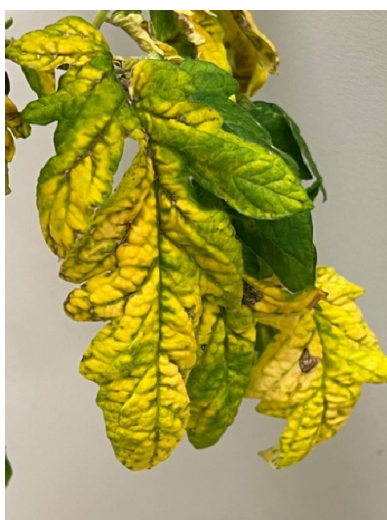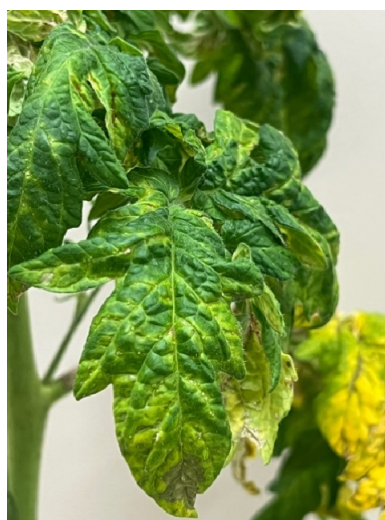

VP35



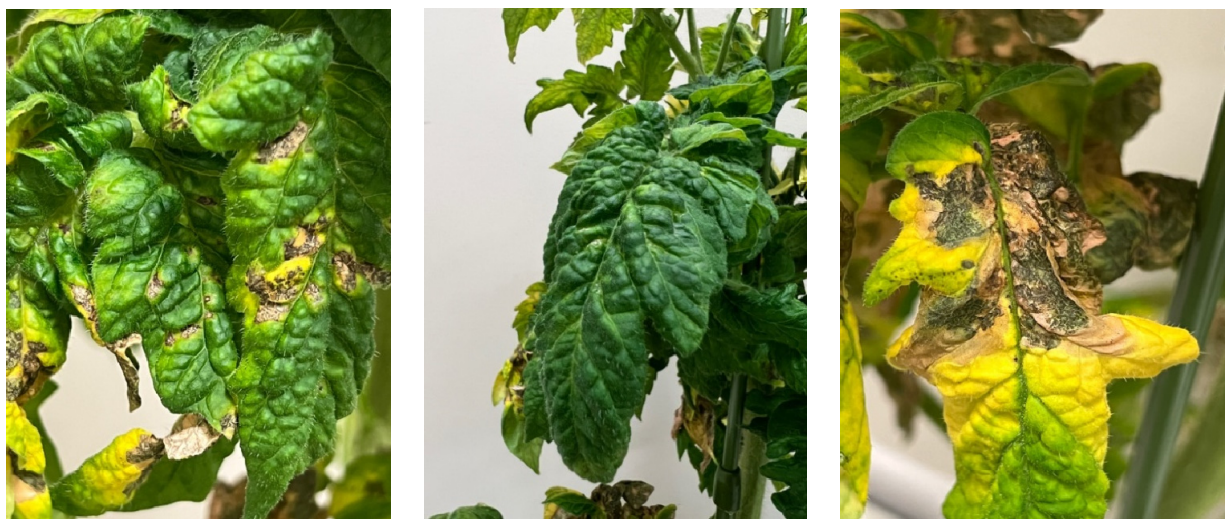

NicTr-3

**Figure S1.** Symptoms on the leaves of tomato cv. Rutgers at 60 dpi with four PSTVd strains.

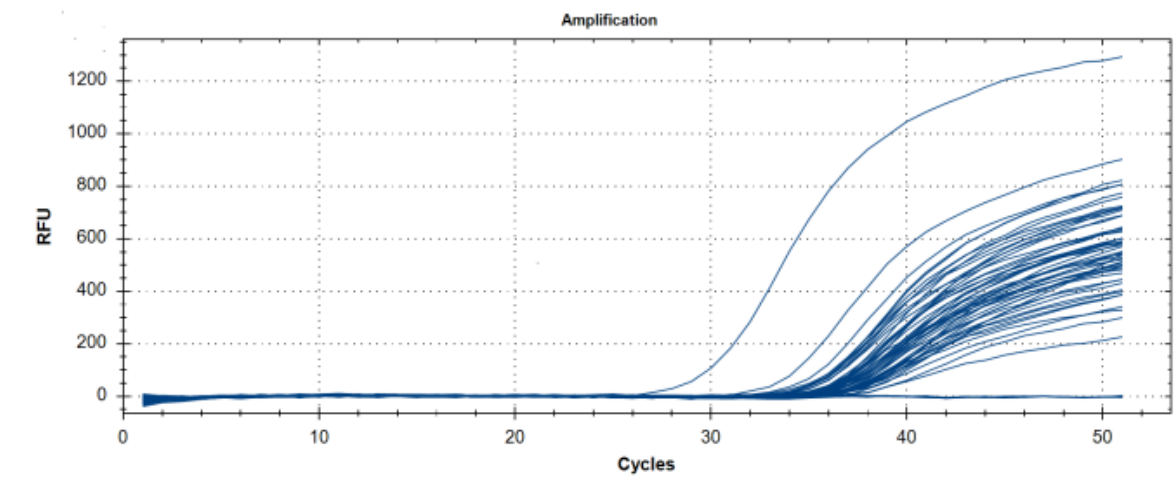

**Figure S2.** The FAM channel of real time PCR for detection of potato spindle tuber viroid in different potato cultivars.

**Table S2.** Symptoms on second generation plants derived from PSTVd-infected but normal in shape tubers

| Cultivar  | Strain  | Delayed sprouting, days in compare with mock | Symptoms on the haulm | Number/average tubers weight per plant |         |
|-----------|---------|----------------------------------------------|-----------------------|----------------------------------------|---------|
|           |         |                                              |                       | PSTVd-infected                         | Mock    |
| Arizona   | VP87    | 5                                            | TS, SL                | no                                     | 5/110.4 |
| Bernina   | NicTr3  | 13                                           | TS, SL, NEC           | 2/1.70                                 | 4/98.7  |
| Bernina   | FP10-13 | >30                                          | TS, SL, NEC           | no                                     | 4/98.7  |
| Donata    | NicTr3  | No sprouts                                   | –                     | –                                      | 3/100.3 |
| Elizaveta | VP35    | 7                                            | TS, SL, NEC           | 1/0.75                                 | 3/85.2  |
| Colomba   | NicTr3  | 6                                            | TS, SL, NEC           | 2/1.75 D                               | 4/164.7 |
| Krepysh   | VP87    | 19                                           | TS, SL                | no                                     | 3/81.4  |
| Labadia   | FP10-13 | 10                                           | TS, SL                | 2/0.10 D                               | 4/83.1  |
| Labadia   | VP35    | 10                                           | TS, SL, NEC           | 1/1.20                                 | 4/83.1  |

|           |         |            |              |          |         |
|-----------|---------|------------|--------------|----------|---------|
| Mirazh    | NicTr3  | 6          | TS, SL       | 6/1.38   | 7/112.8 |
| Navigator | NicTr3  | 6          | TS, SL, NEC  | 3/8.50   | 4/117.8 |
| Nevskiy   | NicTr3  | 10         | TS, SL, NEC  | 1/0.11 D | 5/97.4  |
| Nevskiy   | VP87    | 5          | TS, SL, NEC  | 3/17.87  | 5/97.4  |
| Riviera   | NicTr3  | No sprouts | –            | –        | 4/102.5 |
| Sapsan    | NicTr3  | 12         | TS, SL       | no       | 3/84.8  |
| Sorentina | NicTr3  | 10         | TS, SL       | no       | 4/96.2  |
| Sorentina | VP87    | 12         | TS, SL       | no       | 4/96.2  |
| Sorentina | FP10-13 | >30        | TS, SL, NEC  | no       | 4/96.2  |
| Udacha    | NicTr3  | 12         | TS, SL, NEC. | 9/2.29 M | 4/103.7 |
| Udacha    | VP35    | 5          | TS, SL, NEC. | 1/0.11 M | 4/103.7 |
| Favorit   | NicTr3  | >30        | TS, SL       | no       | 5/125.8 |
| Flagman   | VP35    | 5          | TS, SL, NEC  | 3/0.33 M | 4/112.6 |

Note: TS – thin stem, SL – small leaves, NEC – leaf necrosis, D – deformation, M – tubers miniaturization; no – no tubers.

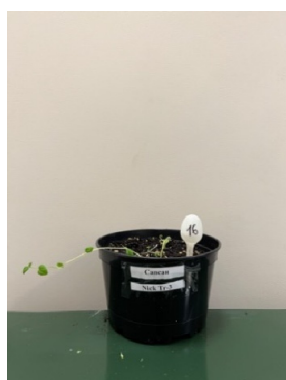

1

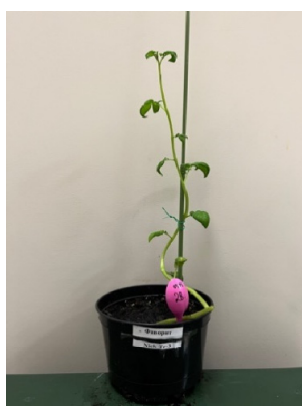

2

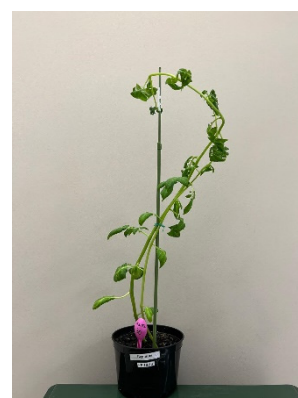

3

**Figure S3.** Potato cultivars 90 days after planting with PSTVd-infected tubers that appeared 30-48 days later 1 – Sapsan, strain NicTr-3; 2 – Favorit, strain NicTr-3; 3 – Bernina, strain FP10-13.

**Table S3.** Average tuber weight per plant of PSTVd-infected (strain NicTr-3), viral-infected, and mixed viroid (strain NicTr-3)/viral infected plants

| Netherlands viral infected plants |                  |                                   |                                                |
|-----------------------------------|------------------|-----------------------------------|------------------------------------------------|
| Virus/viroid                      | Number of plants | Average tuber weight per plant, g |                                                |
|                                   |                  | Infected                          | Mock, mean value for 6 plants of each cultivar |
| cv. Impala                        |                  |                                   |                                                |
|                                   |                  |                                   |                                                |
| PVX+PSTVd                         | 1                | 32.7                              | 129.7                                          |

|                   |   |       |       |
|-------------------|---|-------|-------|
| PVM+PSTVd         | 1 | 29.8  |       |
| PVY+PSTVd         | 1 | 20.4  |       |
| PVX+PVS+PVM+PSTVd | 4 | 43.3  |       |
| PVX+PVS+PVM       | 3 | 109.8 |       |
| PVX+PVS           | 1 | 109.6 |       |
| PVX+PVY+PVS+PVM   | 1 | 67.8  |       |
| PSTVd             | 2 | 32.4  |       |
| cv. Colomba       |   |       |       |
| PVY+PSTVd         | 3 | 89.8  | 170.4 |
| PVY               | 3 | 160.8 |       |
| PVX+PVY+PSTVd     | 1 | 124.1 |       |
| PVM+PSTVd         | 1 | 84.6  |       |
| PVM+PVY+PSTVd     | 1 | 134.1 |       |
| PVY+PVS+PVM+PSTVd | 1 | 144.3 |       |
| PSTVd             | 6 | 117.7 |       |
| cv. Sanibel       |   |       |       |
| PVM+PSTVd         | 1 | 75.3  | 108.7 |
| PVX+PVM+PSTVd     | 1 | 46.2  |       |
| PVY               | 1 | 45.0  |       |
| PVM               | 1 | 68.0  |       |
| PSTVd             | 8 | 69.9  |       |
| cv. Favorit       |   |       |       |
| PVX+PSTVd         | 1 | 67.1  | 125.8 |
| PVX+PVM+PSTVd     | 1 | 36.1  |       |
| PSTVd             | 3 | 65.6  |       |
| cv. Navigator     |   |       |       |
| PVM+PSTVd         | 3 | 54.1  | 117.8 |

|                     |   |          |       |
|---------------------|---|----------|-------|
| PVY+PVS+PVM+PSTVd   | 1 | 92.6     |       |
| PSTVd               | 2 | 62.8     |       |
| cv. Phioletovii     |   |          |       |
| PVY+PSTVd           | 2 | 15.6     | 120.9 |
| PVY+PVS+PSTVd       | 2 | 24.1     |       |
| PSTVd               | 2 | 23.7     |       |
| cv. Briz            |   |          |       |
| PVM+PSTVd           | 1 | 9.3      | 110.3 |
| PSTVd               | 4 | 28.3     |       |
| cv. Vineta          |   |          |       |
| PVY+PVS+PSTVd       | 2 | 37.6     | 98.4  |
| PVS+PSTVd           | 1 | 22.9     |       |
| PSTVd               | 1 | 27.9     |       |
| cv. Bizon           |   |          |       |
| PVM+PSTVd           | 1 | No tuber | 95.9  |
| PSTVd               | 2 | No tuber |       |
| cv. Labadia         |   |          |       |
| PVY+PSTVd           | 1 | 21.6     | 83.1  |
| PVY+PVS+PSTVd       | 1 | 43.4     |       |
| PSTVd               | 2 | 60.1     |       |
| cv. Sineglazka 2016 |   |          |       |
| PVY+PSTVd           | 1 | No tuber | 96.2  |
| PSTVd               | 3 | 23.3     |       |

**Table S4.** Symptoms on tubers of three potato cultivars when infected with PSTV strain NicTr-3 and mixed viral/viroid infection

|                                 | Number of tubers | Weight, g | Symptoms                                                                             |
|---------------------------------|------------------|-----------|--------------------------------------------------------------------------------------|
| <b>cv. Colomba</b>              |                  |           |                                                                                      |
| <b>PSTVd+PVY</b>                | 8                | 93.7      |    |
| <b>PSTVd+PVY</b>                | 3                | 106.8     |    |
| <b>PSTVd+PVY</b>                | 3                | 68.8      |   |
| Mean value for <b>PSTVd+PVY</b> | 4.66             | 89.77     |                                                                                      |
| <b>PVY</b>                      | 5                | 156.3     |  |
| <b>PVY</b>                      | 5                | 141.5     |  |
| <b>PVY</b>                      | 4                | 184.5     |  |
| Mean value for <b>PVY</b>       | 4.66             | 160.77    |                                                                                      |
| <b>PSTVd</b>                    | 6                | 33.9      |  |

|                             |      |        |                                                                                      |
|-----------------------------|------|--------|--------------------------------------------------------------------------------------|
| <b>PSTVd</b>                | 5    | 88.8   |    |
| <b>PSTVd</b>                | 10   | 145.1  |    |
| <b>PSTVd</b>                | 7    | 134.3  |    |
| <b>PSTVd</b>                | 3    | 135.3  |    |
| <b>PSTVd</b>                | 9    | 168.9  |    |
| Mean value for <b>PSTVd</b> | 6.67 | 117.72 |                                                                                      |
| <b>Mock 1</b>               | 7    | 173.2  |   |
| <b>Mock 2</b>               | 5    | 167.7  |  |
| <b>Mock 3</b>               | 10   | 166.3  |  |
| <b>Mock 4</b>               | 9    | 174.2  |  |
| Mean value for <b>Mock</b>  | 7.75 | 170.35 |                                                                                      |
| <b>PVM</b>                  | 5    | 84.6   |  |
| <b>PSTVd+PVX+PVY</b>        | 8    | 124.1  |  |



|                      |     |       |                                                                                      |
|----------------------|-----|-------|--------------------------------------------------------------------------------------|
| PSTVd+PVY+PVS+PVM    | 6   | 144.3 |    |
| PVY+PVM              | 8   | 134.1 |    |
| cv. Impala           |     |       |                                                                                      |
| PSTVd                | 7   | 28.9  |    |
| PSTVd                | 2   | 32.4  |    |
| Mean value for PSTVd | 4.5 | 30.65 |                                                                                      |
| PSTVd+PVY            | 2   | 20.4  |   |
| PSTVd+PVM            | 2   | 29.8  |  |
| PSTVd+PVX            | 4   | 32.7  |  |
| PSTVd+PVX+PVS        | 6   | 109.6 |  |
| PSTVd+PVY+PVM        | 3   | 54.6  |  |
| PSTVd+PVX+PVS+PVM    | 2   | 35.0  |  |

|                                            |      |       |  |                                                                                      |  |
|--------------------------------------------|------|-------|--|--------------------------------------------------------------------------------------|--|
| <b>PSTVd+PVX+PVS+PVM</b>                   | 2    | 9.2   |  |    |  |
| <b>PSTVd+PVX+PVS+PVM</b>                   | 6    | 85.9  |  |    |  |
| Mean value for<br><b>PSTVd+PVX+PVS+PVM</b> | 3.3  | 43.37 |  |                                                                                      |  |
| <b>PSTVd+PVY+PVX+PVS+PVM</b>               | 2    | 67.8  |  |    |  |
| <b>PVX+PVS+PVM</b>                         | 6    | 98.3  |  |   |  |
| <b>PVX+PVS+PVM</b>                         | 8    | 109.6 |  |  |  |
| <b>PVX+PVS+PVM</b>                         | 3    | 121.5 |  |  |  |
| Mean value for<br><b>PVX+PVS+PVM</b>       | 5.67 | 109.8 |  |                                                                                      |  |
| <b>Mock 1</b>                              | 6    | 187.5 |  |  |  |

|                      |      |        |                                                                                      |
|----------------------|------|--------|--------------------------------------------------------------------------------------|
| Mock 2               | 7    | 71.8   |    |
| Mean value for Mock  | 6.5  | 129.65 |                                                                                      |
| cv. Sanibel          |      |        |                                                                                      |
| PSTVd                | 3    | 56.8   |    |
| PSTVd                | 2    | 78.0   |    |
| PSTVd                | 2    | 99.1   |   |
| PSTVd                | 3    | 79.2   |  |
| PSTVd                | 1    | 45.7   |  |
| PSTVd                | 3    | 57.3   |  |
| PSTVd                | 2    | 44.9   |  |
| Mean value for PSTVd | 2.28 | 65.86  |                                                                                      |
| PSTVd +PVY           | 1    | 45.0   |  |

|                          |     |        |                                                                                      |  |
|--------------------------|-----|--------|--------------------------------------------------------------------------------------|--|
| PSTVd +PVM               | 2   | 75.3   |    |  |
| PSTVd +PVM               | 2   | 68.0   |    |  |
| Mean value for PSTVd+PVM | 2   | 71.65  |                                                                                      |  |
| PSTVd +PVM+PVX           | 2   | 46.2   |    |  |
| Mock 1                   | 4   | 127.2  |   |  |
| Mock 2                   | 3   | 129.5  |  |  |
| Mock 3                   | 2   | 104.6  |  |  |
| Mock 4                   | 2   | 90.4   |  |  |
| Mock 5                   | 1   | 92.0   |  |  |
| Mean value for Mock      | 2.4 | 108.74 |                                                                                      |  |



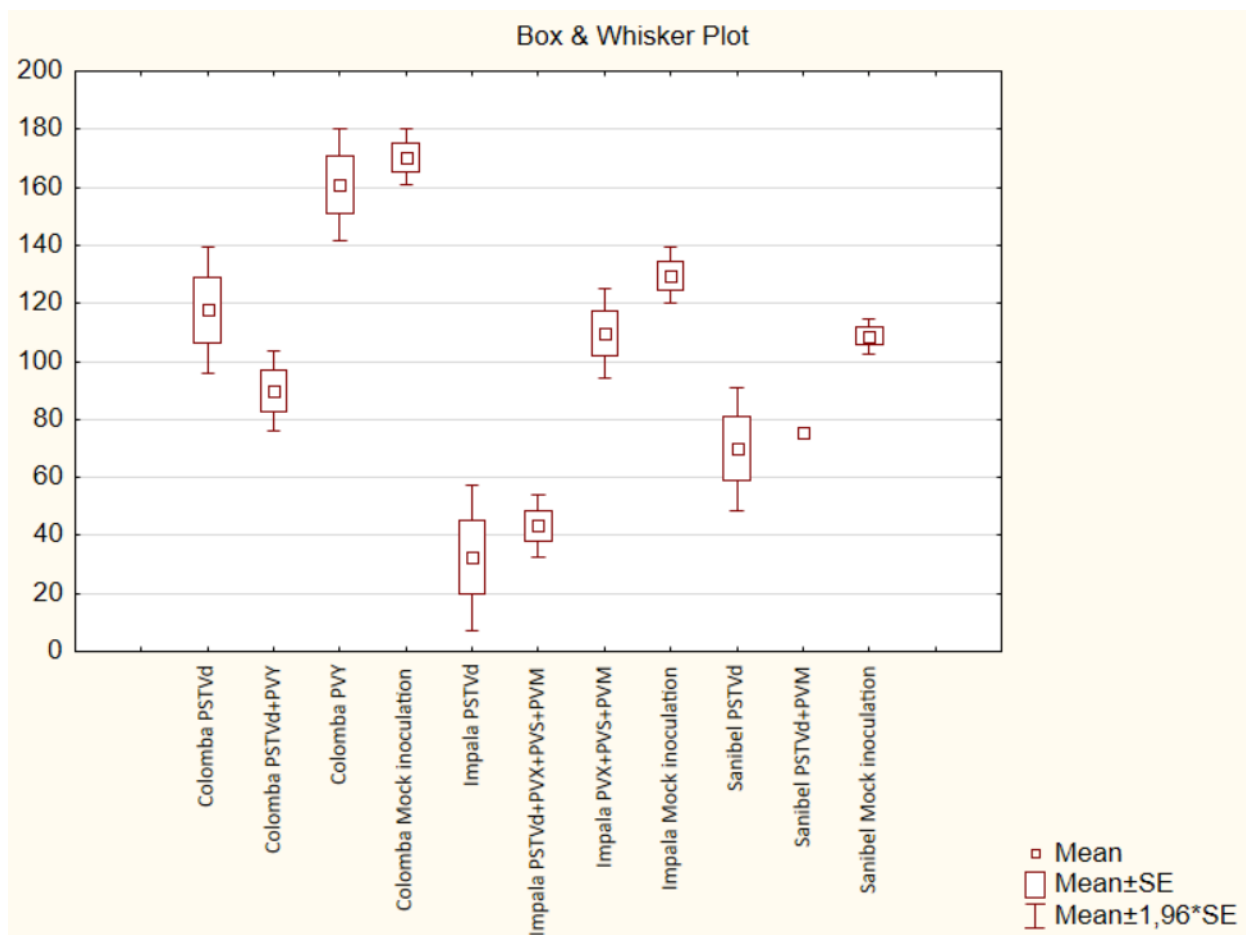

**Figure S4.** Mean error when comparing weight of tubers per plant infected with PSTVd (strain NickTr-3), viral-infected and viroid/viral- mixed infected of three potato cultivars.

**Table S5.** Student's *t*-test with Bonferroni correction when comparing mean weight of tubers per plant infected with PSTVd (strain NickTr-3), viral-infected and viroid/viral- mixed infected of three potato cultivars. All significance levels less than 0.05 are highlighted in red.

A1-A4 – cv. Colomba: A1 – PSTVd, A2 – PSTVd+PVY, A3 – PVY, A4 – Mock; A5-A8 – cv. Impala: A5 – PSTVd, A6 – PSTVd+PVX+PVS+PVM, A7 – PVX+PVS+PVM, A8 – Mock; A9-A11 – cv. Sanibel: A9 – PSTVd, A10 – PSTVd+PVM, A11 – Mock.

| Cell<br>№ | Bonferroni test; variable Mass of potato tubers (Spreadsheet3) |              |             |              |              |             |             |              |              |             |              |               |
|-----------|----------------------------------------------------------------|--------------|-------------|--------------|--------------|-------------|-------------|--------------|--------------|-------------|--------------|---------------|
|           | Probabilites for Post Hoc Tests                                |              |             |              |              |             |             |              |              |             |              |               |
|           | Error: Between MS = 377.87, <i>df</i> = 37.000                 |              |             |              |              |             |             |              |              |             |              |               |
|           | Level A                                                        | (1)<br>117.7 | (2)<br>89.8 | (3)<br>160.8 | (4)<br>170.4 | (5)<br>32.4 | (6)<br>43.3 | (7)<br>109.8 | (8)<br>129.7 | (9)<br>69.9 | (10)<br>75.3 | (11)<br>108.7 |
| 1         | A1                                                             |              | 1.00        | 0.18         | 0.00         | 0.00        | 0.00        | 1.00         | 1.00         | 0.00        | 1.00         | 1.00          |
| 2         | A2                                                             | 1.00         |             | 0.00         | 0.00         | 0.14        | 0.19        | 1.00         | 0.34         | 1.00        | 1.00         | 1.00          |
| 3         | A3                                                             | 0.18         | 0.00        |              | 1.00         | 0.00        | 0.00        | 0.15         | 1.00         | 0.00        | 0.03         | 0.03          |
| 4         | A4                                                             | 0.00         | 0.00        | 1.00         |              | 0.00        | 0.00        | 0.00         | 0.05         | 0.00        | 0.00         | 0.00          |
| 5         | A5                                                             | 0.00         | 0.14        | 0.00         | 0.00         |             | 1.00        | 0.00         | 0.00         | 1.00        | 1.00         | 0.00          |
| 6         | A6                                                             | 0.00         | 0.19        | 0.00         | 0.00         | 1.00        |             | 0.00         | 0.00         | 1.00        | 1.00         | 0.00          |
| 7         | A7                                                             | 1.00         | 1.00        | 0.15         | 0.00         | 0.01        | 0.00        |              | 1.00         | 0.24        | 1.00         | 1.00          |
| 8         | A8                                                             | 1.00         | 0.34        | 1.00         | 0.05         | 0.00        | 0.00        | 1.00         |              | 0.00        | 0.75         | 1.00          |
| 9         | A9                                                             | 0.00         | 1.00        | 0.00         | 0.00         | 1.00        | 1.00        | 0.24         | 0.00         |             | 1.00         | 0.04          |
| 10        | A10                                                            | 1.00         | 1.00        | 0.03         | 0.00         | 1.00        | 1.00        | 1.00         | 0.75         | 1.00        |              | 1.00          |
| 11        | A11                                                            | 1.00         | 1.00        | 0.03         | 0.00         | 0.00        | 0.00        | 1.00         | 1.00         | 0.04        | 1.00         |               |

**Table S6.** Student's *t*-test with Bonferroni correction when comparing weight of tubers per plant of PSTVd-infected, viral-infected and viroid/viral-mixed infected plants regardless of cultivar: A1 - Mock ; A2 - PVY; A3 - PSTVd; A4 - PVY + PSTVd ; A5 - PVM + PSTVd ; A6 - PVY + PVS + PSTVd . All significance levels less than 0.05 are highlighted in red.

| Bonferroni test; variable Масса клубней (Spreadsheet3) |           |               |               |               |               |               |               |
|--------------------------------------------------------|-----------|---------------|---------------|---------------|---------------|---------------|---------------|
| Probabilities for Post Hoc Tests                       |           |               |               |               |               |               |               |
| Error: Between MS = 911,45, df = 116,00                |           |               |               |               |               |               |               |
| Cell No.                                               | Уровень A | {1}<br>115,31 | {2}<br>131,85 | {3}<br>61,552 | {4}<br>48,943 | {5}<br>51,614 | {6}<br>33,360 |
| 1                                                      | A1        |               | 1,000000      | 0,000000      | 0,000003      | 0,000008      | 0,000001      |
| 2                                                      | A2        | 1,000000      |               | 0,000365      | 0,000390      | 0,000676      | 0,000055      |
| 3                                                      | A3        | 0,000000      | 0,000365      |               | 1,000000      | 1,000000      | 0,811436      |
| 4                                                      | A4        | 0,000003      | 0,000390      | 1,000000      |               | 1,000000      | 1,000000      |
| 5                                                      | A5        | 0,000008      | 0,000676      | 1,000000      | 1,000000      |               | 1,000000      |
| 6                                                      | A6        | 0,000001      | 0,000055      | 0,811436      | 1,000000      | 1,000000      |               |
